# Supplementary material
Source: Springer Nature journal article supplement (https://www.springermedizin.de/resource/supplementary/13024_2013_408_MOESM9_ESM.pdf/9644068)

A

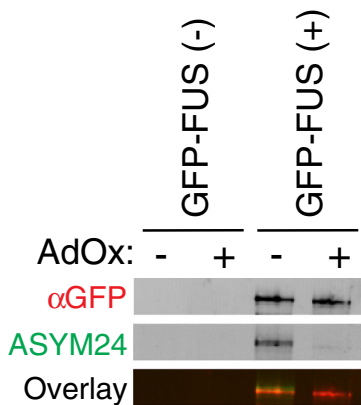

C

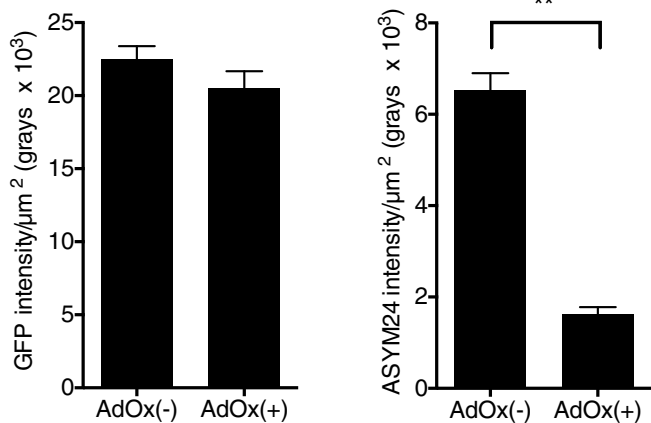

B

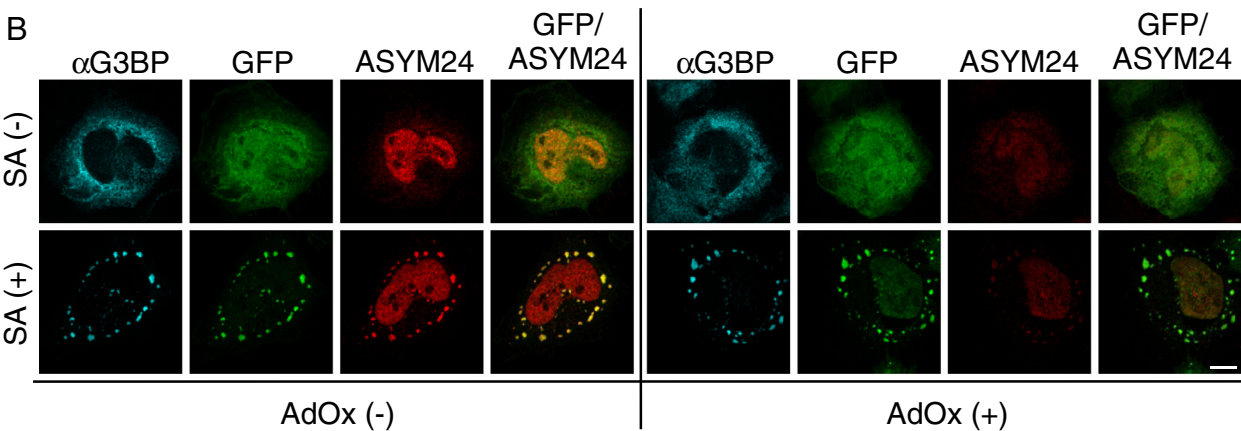

Supplement: MOESM9 [file 9644068]
